# Supplementary material
Source: HighWire-hosted journal article supplement (https://sti.bmj.com/content/sextrans-2019-054124)
Supplement: inline-supplementary-material-1 [file inline-supplementary-material-1.pdf]

**Supplementary material.****Characteristics of users attending to DrasExp during the study period: comparison between recruited and non-recruited individuals.**

| Characteristic                  | Recruited individuals<br>No.; % (95% CI) | Non-recruited individuals<br>No.; % (95% CI) | P value* |
|---------------------------------|------------------------------------------|----------------------------------------------|----------|
| Total                           | 890                                      | 299                                          |          |
| Age (years) <sup>a</sup>        |                                          |                                              | NS       |
| - <25                           | 208; 23.4 (20.6-26.3)                    | 71; 23.7 (19.0-29.0)                         |          |
| - 26-35                         | 361; 40.6 (37.3-43.9)                    | 117; 39.1 (33.6-44.9)                        |          |
| - 36-45                         | 207; 23.3 (20.5-26.2)                    | 71; 23.7 (19.0-29.0)                         |          |
| - >45                           | 114; 12.8 (10.7-15.2)                    | 40; 13.4 (9.7-17.8)                          |          |
| Sexual conduct                  |                                          |                                              |          |
| - Women                         | 222; 24.9 (22.1-27.9)                    | 99; 33.1 (27.8-38.8)                         | 0.006    |
| - MSW                           | 179; 20.1 (17.5-22.9)                    | 82; 27.4 (22.4-32.9)                         | 0.008    |
| - MSM                           | 489; 54.9 (51.6-58.2)                    | 118; 39.5 (33.9-45.3)                        | <0.001   |
| Origin                          |                                          |                                              | NS       |
| - Spanish                       | 527; 59.2 (55.9-62.5)                    | 170; 56.9 (51.0-62.5)                        |          |
| - Non-Spanish                   | 363; 40.8 (37.5-44.1)                    | 129; 43.1 (37.5-49.0)                        |          |
| Sexual partners (last 3 months) |                                          |                                              | NS       |
| - 1-5                           | 636; 71.5 (68.4-74.4)                    | 230; 76.9 (71.7-81.6)                        |          |
| - 6-20                          | 213; 23.9 (21.2-26.9)                    | 55; 18.4 (14.2-23.3)                         |          |
| - >20                           | 41; 4.6 (3.3-6.2)                        | 14; 4.7 (2.6-7.7)                            |          |
| HIV history <sup>a</sup>        |                                          |                                              | NS       |
| - No                            | 811; 91.1 (89.1-92.9)                    | 281; 94.0 (90.7-96.4)                        |          |
| - Yes                           | 79; 8.9 (7.1-10.9)                       | 18; 6.0 (3.6-9.3)                            |          |
| Syphilis history <sup>a</sup>   |                                          |                                              | 0.002    |
| - No                            | 720; 80.9 (78.2-83.4)                    | 265; 88.6 (84.5-92.0)                        |          |
| - Yes                           | 170; 19.1 (16.6-21.8)                    | 34; 11.4 (8.0-15.5)                          |          |

Abbreviations: MSM, men who have sex with men; MSW, men who have sex with women; HIV, Human Immunodeficiency Virus; CI, confidence interval; NS, not significant.

<sup>a</sup>Due to ethical limitations, data is limited to what has been collected exclusively from the questionnaire, without taking the current STI screening results into account.

\*Chi-squared ( $\chi^2$ ) tests.
