# Supplementary material
Source: HighWire-hosted journal article supplement (https://sti.bmj.com/content/sextrans-2019-054124)
Supplement: inline-supplementary-material-2 [file inline-supplementary-material-2.pdf]

### Objetivos

A pesar de que recientemente se han implementado programas de detección rápida y tratamiento precoz para abordar las infecciones de transmisión sexual (ITS), actualmente no se recomienda la detección sistemática de *Mycoplasma genitalium* (MG) en poblaciones asintomáticas debido a la falta de evidencia científica y la aparición de resistencia a los antibióticos. El objetivo principal de este estudio fue estimar la prevalencia de MG y su resistencia a macrólidos entre individuos asintomáticas que visitaban un servicio de *point-of-care* para la detección rápida de ITS; e identificar los factores de riesgo asociados con la adquisición de esta infección.

### Métodos

Entre octubre de 2017 y enero de 2018, a un total de 890 personas asintomáticas que acudieron al servicio de cribado para ITS Drassanes Exprés en Barcelona, España, se les determinó la presencia de MG y su resistencia a macrólidos mediante la prueba de diagnóstico molecular ResistancePlus® MG (SpeeDx, Australia). Además, se invitó a los individuos con infección asintomática por MG a acudir a la Unidad de ITS para recibir tratamiento antibiótico dirigido según el resultado del estudio de resistencia.

### Resultados

La prevalencia de MG en el grupo de estudio fue del 7.4% (66/890; [IC 95%, 5.8% a 9.3%]), siendo mayor entre los hombres que tenían sexo con hombres (HSH) (46/489) en comparación con los hombres heterosexuales y las mujeres (20/401);  $p = 0.012$ . Se detectó la presencia de mutaciones causantes de resistencia a macrólidos en 32/46 (69.6%; [IC 95%, 54.2% a 82.3%]) HSH, mientras que solo en 2/20 (10.0%; [IC 95%, 1.2% a 31.7%]) en el grupo de población heterosexual; ( $p < 0.001$ ). Los factores asociados de forma significativa con la infección por MG fueron: HSH, sexo anal receptivo, infección por VIH, antecedentes de sífilis y una actividad sexual de riesgo (más de cinco parejas sexuales en los últimos tres meses). Además, el abordaje de tratamiento antibiótico dirigido pudo realizarse en 36/66 (54.6%) individuos.

**Conclusiones**

La investigación aporta más datos sobre la prevalencia de la infección por MG y su resistencia a macrólidos entre individuos asintomáticos. También identifica subpoblaciones de mayor riesgo que podrían ser objetivos para el cribado de MG. Sin embargo, en la actualidad no hay datos suficientes para justificar el cribado sistemático de MG entre individuos asintomáticos, y se deben seguir las guías de diagnóstico de ITS actuales hasta que se demuestre el coste-efectividad del cribado.
